# Supplementary material for: Structural Basis for TatA Oligomerization: An NMR Study of Escherichia coli TatA Dimeric Structure
Source: PubMed Central journal article supplement (PMC4121141; doi:10.1371/journal.pone.0103157), 2014-08-04
Supplement: pone.0103157.s001.pdf [file pone.0103157.s001.pdf]

## Supporting Results and Discussion

### *Characterization of the TatA oligomeric states*

The oligomeric state of TatA in DPC micelles varies when the DPC concentration changes. For full-length wt-TatA, we observed a single set of cross peaks corresponding to the monomeric form (1<sup>st</sup> set) at DPR over 200. This result is similar to those reported by Rodriguez *et al* [1], in which they showed that the average oligomeric state is 2.2 at DPR of 250:1 by analytical centrifuge while the NMR spectroscopy display signals of a monomeric form. When the DPR decrease to 20, the full-length wt-TatA displays two clearly distinguishable sets of peaks (1<sup>st</sup> and 2<sup>nd</sup> sets). For some residues, a 3<sup>rd</sup> set of peak was also observable but rather weak (Figure S3). However, the signals of the 3<sup>rd</sup> set are too scarce and too weak in our case to allow more detailed analysis. When we tried to further decrease the DPR by buffer exchange, we observed that the 3<sup>rd</sup> set became dominant, while the 2<sup>nd</sup> set disappeared (Figure S4). However, the NMR sample under this condition was unstable and precipitated after the HSQC experiments, and the exact DPR was difficult to determine.

To overcome the problem of spectral overlap, we repeated the oligomeric state characterizations using a truncated TatA mutant (TatA<sub>1-55</sub>). Judging by the positions of glycine cross-peaks and backbone NH chemical shifts of residues in the hinge region (Figure S5), the 3<sup>rd</sup> set of signals is most similar to those of the ‘9-mer’ TatA complex observed by Rodriguez *et al* [1]. Moreover, we observed that the truncated variant shows a somewhat different DPR-dependent oligomerization tendency as compared to the full-length protein. Briefly, the TatA<sub>1-55</sub> sample aggregates more easily compared to full-length TatA. For example, at DPR of about 20, the full-length TatA shows a peak volume distribution for states 1<sup>st</sup>:2<sup>nd</sup>:3<sup>rd</sup> of ~ 3.3:2.4:1, with the monomeric state in the largest population (Figure S3). However, for TatA<sub>1-55</sub>, at even higher DPR (~30), the peak volume distribution of the 1<sup>st</sup>:2<sup>nd</sup>:3<sup>rd</sup> set is 0.75:1:1, with the higher oligomeric states dominant (Figure S5). This result suggests that the unstructured C-terminus (residue 56-89) may have negative effects on TatA oligomerization in DPC micelles. Nevertheless, the patterns

and positions of the three peak sets are essentially similar for TatA<sub>1-55</sub> and full-length TatA. Therefore, we used the TatA<sub>1-55</sub> sample for further PRE and dynamics measurements to determine the oligomeric state of the 2<sup>nd</sup> set of peaks.

***Oligomeric state determination of 2<sup>nd</sup> set of peaks by backbone <sup>15</sup>N dynamics***

Backbone <sup>15</sup>N dynamics data were collected for TatA<sub>1-55</sub> at DPR of 70. Under this condition, the spectra showed two sets of peaks. The  $R_2/R_1$  ratios were calculated for both the 1<sup>st</sup> and 2<sup>nd</sup> sets of peaks, and the results are shown in Figure 1B. The average  $R_2/R_1$  ratio of residues on the TMH region is 26 for the 1<sup>st</sup> set, and 52 for the 2<sup>nd</sup> set. By assuming a protein-DPC micelle with a spherical shape, the rotational correlation time could be estimated using the formula

$$\tau_c \approx \frac{1}{4\pi\nu_N} \sqrt{6 \frac{R_2}{R_1} - 7} \quad [2]. \text{ In combination with the Stoke's law } \tau_c = \frac{4\pi\eta r^3}{3kT},$$

the diameter of the globular complex can be back calculated using the  $R_2/R_1$  ratio. The average  $R_2/R_1$  ratio of the 1<sup>st</sup> set suggests a protein-DPC complex with a diameter of 51.4 Å, which fits well with a single transmembrane helix surrounded by ~ 54 DPC molecules [3] (Figure S6). The average  $R_2/R_1$  ratio of the 2<sup>nd</sup> set suggests a protein-DPC complex with a diameter of 57.4 Å, corresponding to a ~3 Å increase in radius compared to the 1<sup>st</sup> set. A dimeric model containing two transmembrane helices surrounded by the DPC molecules suggests an average increase of 2.8 Å in radius, whereas a tetrameric model would result in a more significant increase (~6.6 Å) in radius (Figure S6). Therefore, the observed backbone dynamics data of the 2<sup>nd</sup> set of peaks supports the formation of dimers instead of higher oligomeric states.

Furthermore, we constructed an N-terminal disulfide-linked dimer ‘d-MCG-TatA<sub>1-55</sub>’. The manually introduced linkage helps hold two TatA molecules together, enabling the observation of the 2<sup>nd</sup> peak set at relatively high DPR. We measured the backbone dynamics data of the d-MCG-TatA<sub>1-55</sub> sample at DPR ~100 (Figure S7). The results showed that the average  $R_2/R_1$  for residues in the TMH (~ 49) is similar to the value observed for the 2<sup>nd</sup> set of peaks of the TatA<sub>1-55</sub> sample.

### ***Oligomeric state determination of 2<sup>nd</sup> set of peaks by PRE***

The inter-subunit PRE effects measured using a mixed sample of spin-labeled (TatA<sub>1-55</sub>-I12C-MTSL) and <sup>15</sup>N-labeled TatA<sub>1-55</sub> could be used to obtain information on the oligomerization state of the observed peaks. As illustrated in Figure S8, the sideways-pointing spin label would only affect a fraction of the observable NMR signals and cause a reduction of the peak intensities recorded. Based on a dimeric model, the expected signal reduction is ~ 25%. In contrast, the signal intensities are expected to show 40-50% reduction in the cases of trimeric or tetrameric models. The experimental results showed an average 25% signal decrease, which is in agreement with the dimeric model. A similar analysis of the TatA<sub>1-55</sub>-I11C-MTSL sample arrives at the same conclusion that the PRE effects are better correlated with the dimeric model.

### **References**

1. Rodriguez F, Rouse SL, Tait CE, Harmer J, De Riso A, et al. (2013) Structural model for the protein-translocating element of the twin-arginine transport system. Proc Natl Acad Sci U S A 110: E1092-1101.
2. Q. Teng (2005) Structural Biology: Practical NMR Applications. Springer
3. Tieleman DP, van der Spoel D, Berendsen HJC (2000) Molecular dynamics simulations of dodecylphosphocholine micelles at three different aggregate sizes: Micellar structure and chain relaxation. J Phys Chem B 104: 6380-6388.

## Supporting Table

**Table S1. Protein samples and conditions used in this study.**

| Experiments                              | Sample                     | TatA conc.<br>/mM      | DPC conc.<br>/mM <sup>a</sup> | DPR <sup>b</sup> | Signals <sup>c</sup>                                |
|------------------------------------------|----------------------------|------------------------|-------------------------------|------------------|-----------------------------------------------------|
| Monomeric structure determination        | TatA                       | 1                      | 300                           | 300              | 1 <sup>st</sup>                                     |
| Characterization of the oligomeric state | TatA                       | 0.4                    | 9                             | 20               | 1 <sup>st</sup> , 2 <sup>nd</sup> , 3 <sup>rd</sup> |
| Dynamics                                 | TatA                       | 0.5                    | ~100                          | 200              | 1 <sup>st</sup>                                     |
| Dynamics                                 | TatA <sub>1-55</sub>       | 0.9                    | 64                            | 70               | 1 <sup>st</sup> , 2 <sup>nd</sup>                   |
| Dynamics                                 | d-MCG-TatA <sub>1-55</sub> | 1 <sup>d</sup>         | 97                            | 97               |                                                     |
| PRE (I12C-MTSL)                          | TatA <sub>1-55</sub>       | 0.5 (0.5) <sup>e</sup> | 40                            | 40               | 1 <sup>st</sup> , 2 <sup>nd</sup>                   |
| PRE (I11C-MTSL)                          | TatA <sub>1-55</sub>       | 0.5 (0.5) <sup>e</sup> | 45                            | 45               | 1 <sup>st</sup> , 2 <sup>nd</sup>                   |
| Dimeric structure (filter experiments)   | d-MCG-TatA                 | 0.5 (1) <sup>f</sup>   | 130                           | 86               |                                                     |

a. The DPC concentration was determined by the <sup>31</sup>P spectra compared with buffer signals.

b. DPR (detergent : protein molar ratio)

c. Dominant set of signals in NMR spectrum.

d. The protein concentration was calculated based on monomeric TatA molecular weight.

e. The concentration noted outside and inside the brackets corresponds to <sup>15</sup>N-labeled and MTSL-labeled components, respectively.

f. The concentration noted outside and inside the brackets corresponds to <sup>15</sup>N-labeled and unlabeled components, respectively.

## Supporting Figures

Figure S1

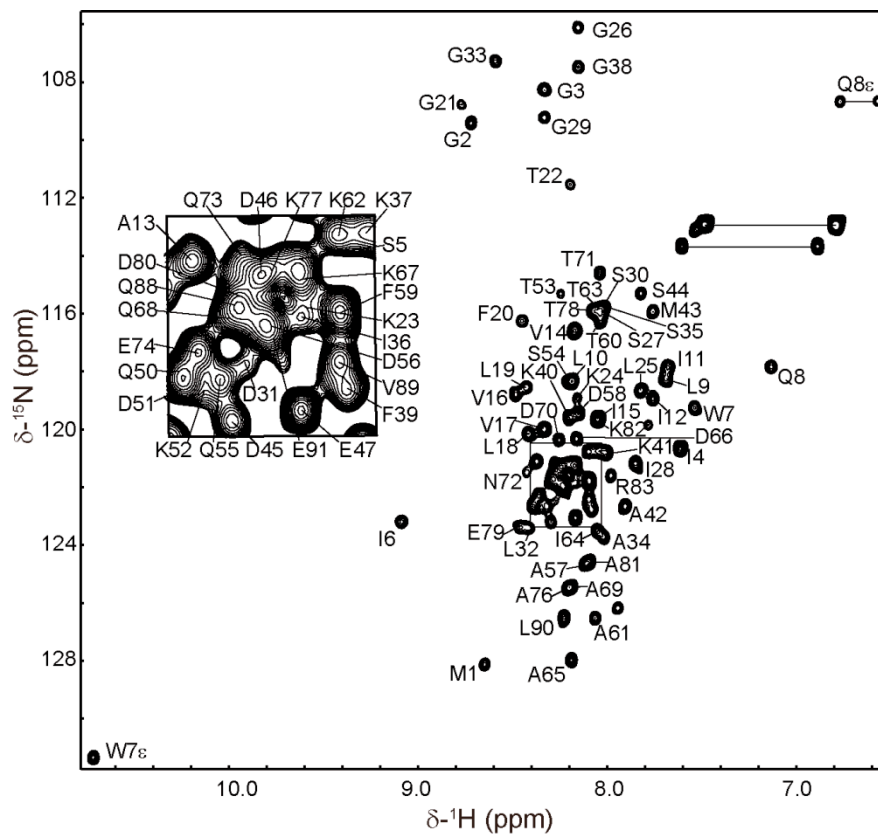

**Figure S1. 2D  $^1\text{H}$ - $^{15}\text{N}$  HSQC spectrum of TatA.** 2D  $^1\text{H}$ - $^{15}\text{N}$  HSQC spectrum of TatA in DPC micelles annotated with the backbone assignments. The spectrum was collected on a Bruker Avance 800 MHz spectrometer (with a cryo-probe) at 35 °C. The assignments are labeled with the one-letter amino acid code and residue number. The side chain  $\text{NH}_2$  peaks of Asn and Gln are connected by horizontal lines. The asterisk indicates residues from the His-tag.

Figure S2

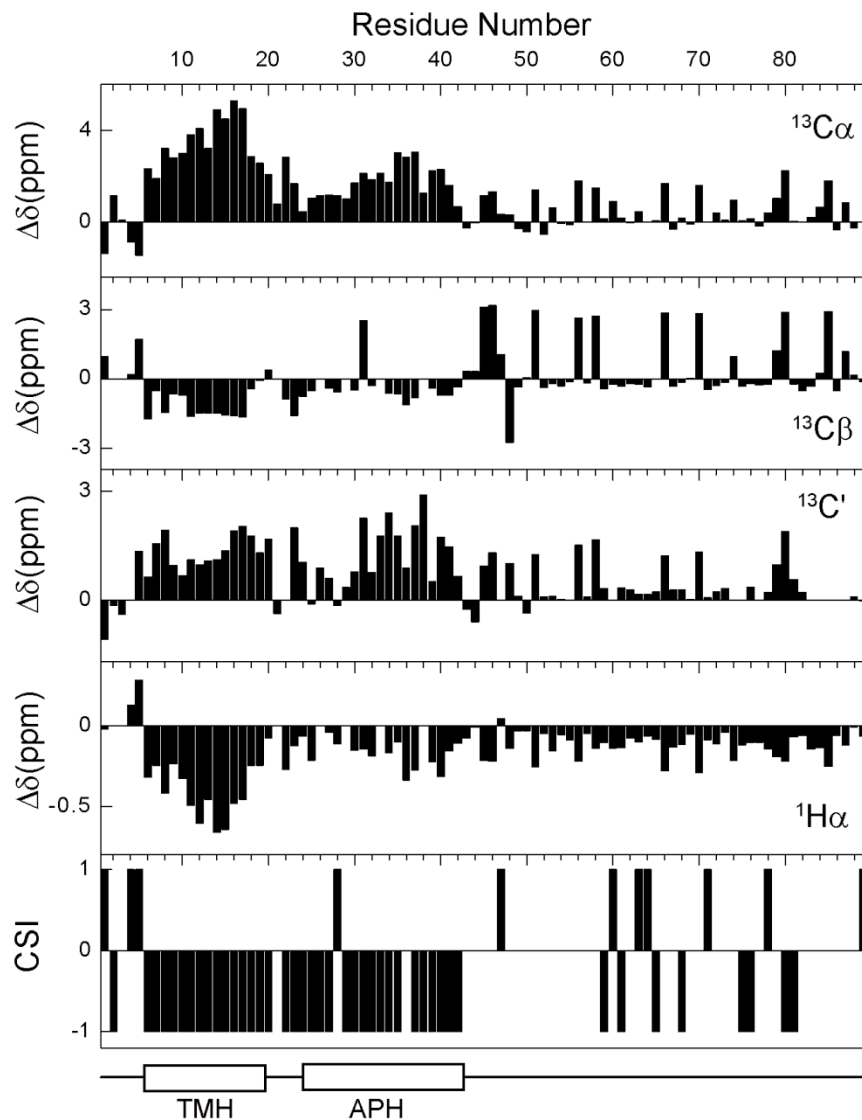

**Figure S2. Secondary structures of *E. coli* TatA.** Secondary chemical shifts for  $^{13}\text{C}_\alpha$ ,  $^{13}\text{C}_\beta$ ,  $^{13}\text{C}'$  and  $^1\text{H}_\alpha$  resonances versus residue numbers and the consensus chemical shift index (CSI) plot of TatA in DPC micelles. The values of CSI for  $\beta$ -strand,  $\alpha$ -helix and random coil are 1, -1 and 0, respectively.

**Figure S3**

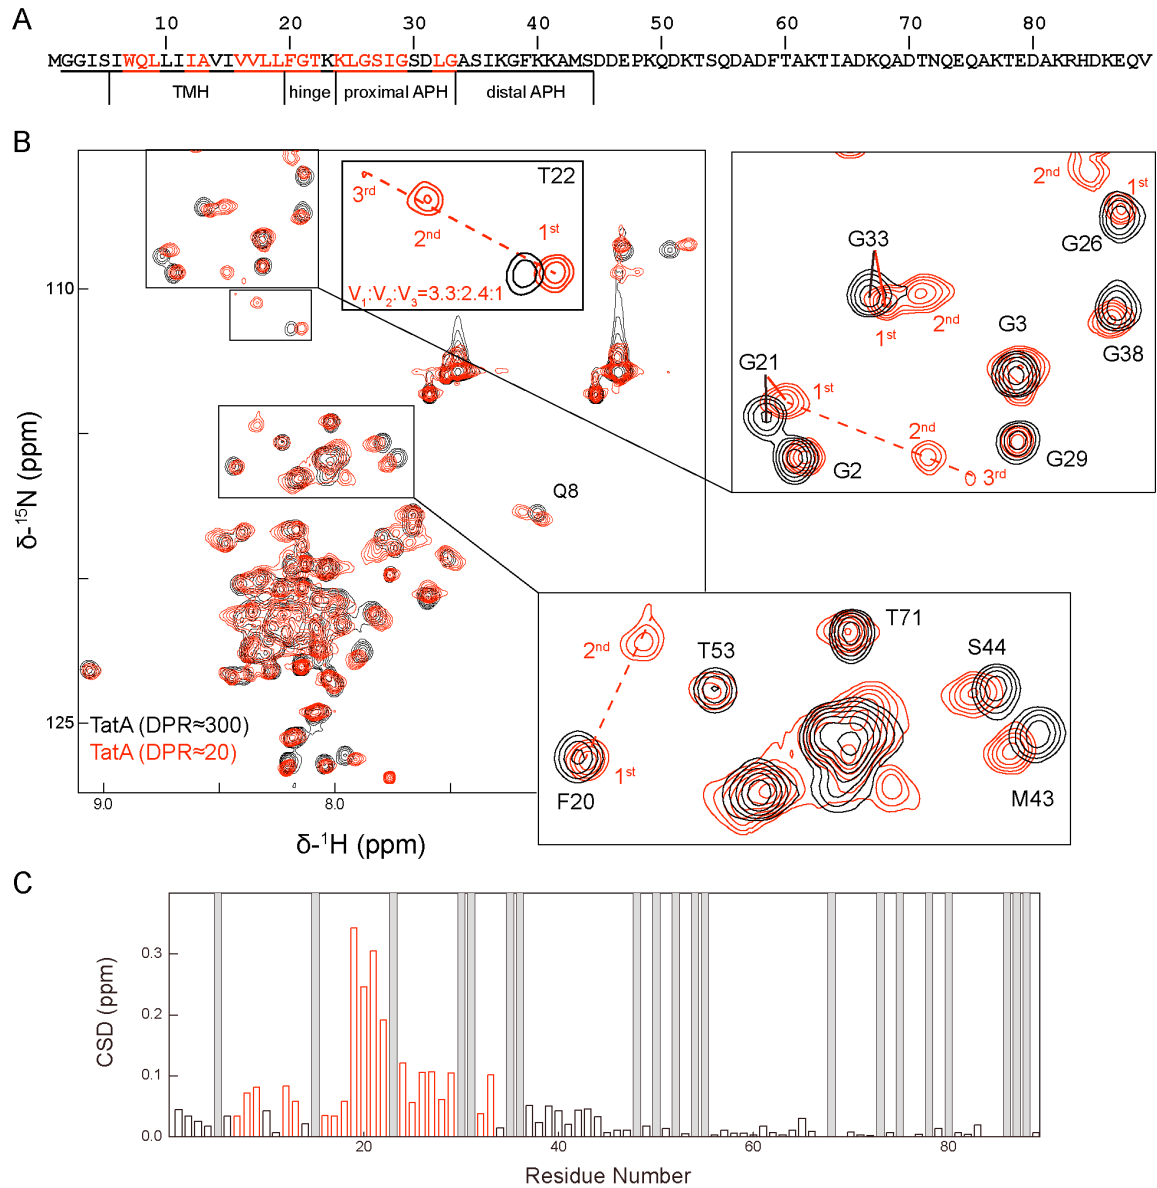

**Figure S3. DPR-dependent spectral changes of full-length TatA.** (A) The protein sequence of TatA is shown at the top to show the region displaying DPR-dependent chemical shift perturbations (underlined) and residues that have multiple sets of peaks (colored in red). (B) <sup>1</sup>H-<sup>15</sup>N HSQC spectrum of full-length TatA at DPR 300 (black) and 20 (red) with dashed lines indicating the signals from the same residues. The population ratios of different conformers were calculated based on peak volumes ( $V_1:V_2:V_3$ ). (C) The composite chemical shift differences

between the two peak sets calculated using the formula  $CSD = \sqrt{\Delta\delta_H^2 + (\Delta\delta_N / 6.5)^2}$ . The red bars represent the residues with multiple sets of signals and the CSD was calculated between the 1<sup>st</sup> and 2<sup>nd</sup> peak sets. The black bars represent residues that show only chemical shift perturbations. Grey background represents residues that could not be analyzed.



**Figure S4**

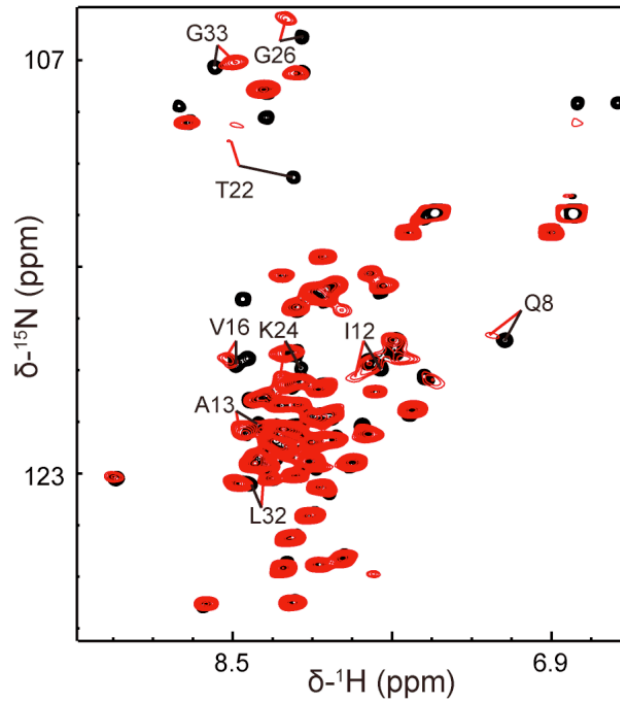

**Figure S4. Characterization of TatA at very low DPR.**  $^1\text{H}$ - $^{15}\text{N}$  HSQC spectrum of full-length TatA at DPR of 300 (black) and an extremely low DPR (< 20, red). Representative residues are labeled with black and red lines.

**Figure S5**

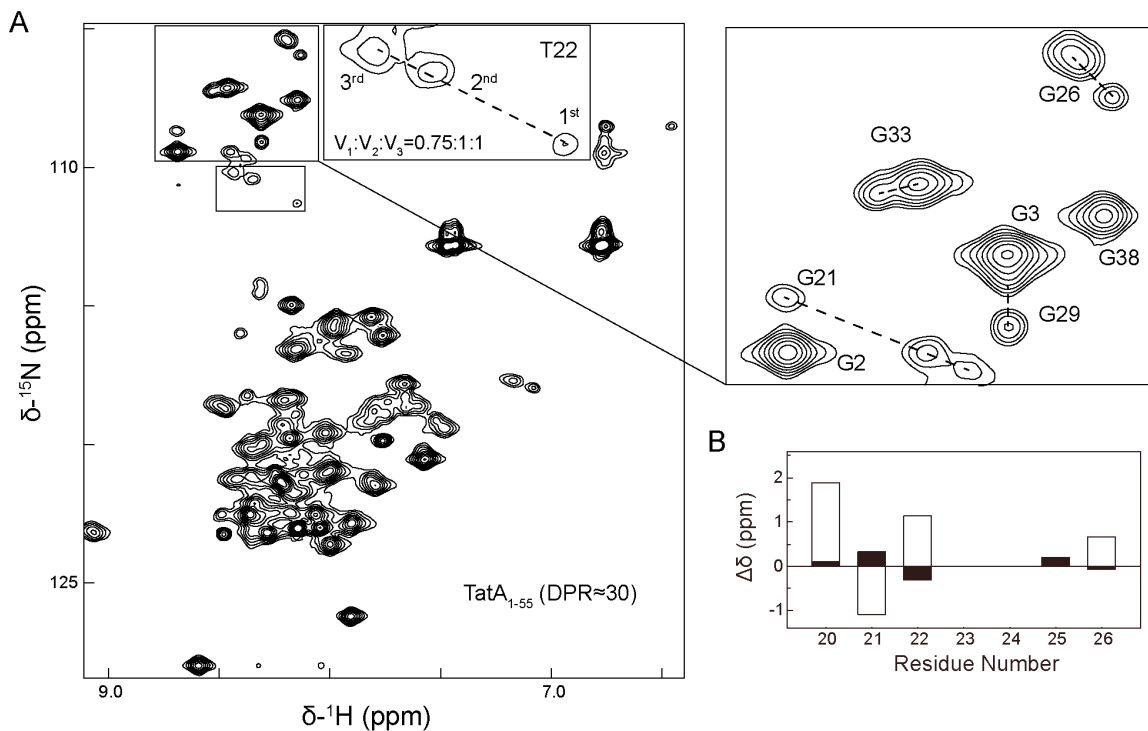

**Figure S5. Characterization of TatA<sub>1-55</sub> at DPR of 30.** (A)  $^1\text{H}$ - $^{15}\text{N}$  HSQC spectrum of TatA<sub>1-55</sub> at DPR of 30 with dashed lines indicating the signals from the same labeled residues. The population ratios of different conformers were calculated based on peak volumes. (B) Chemical shift perturbations between the 1<sup>st</sup> and 3<sup>rd</sup> peak sets of residues in the hinge region. Open and filled bars correspond to the chemical shift changes of backbone  $^{15}\text{N}$  and  $^1\text{HN}$  atoms, respectively.

**Figure S6**

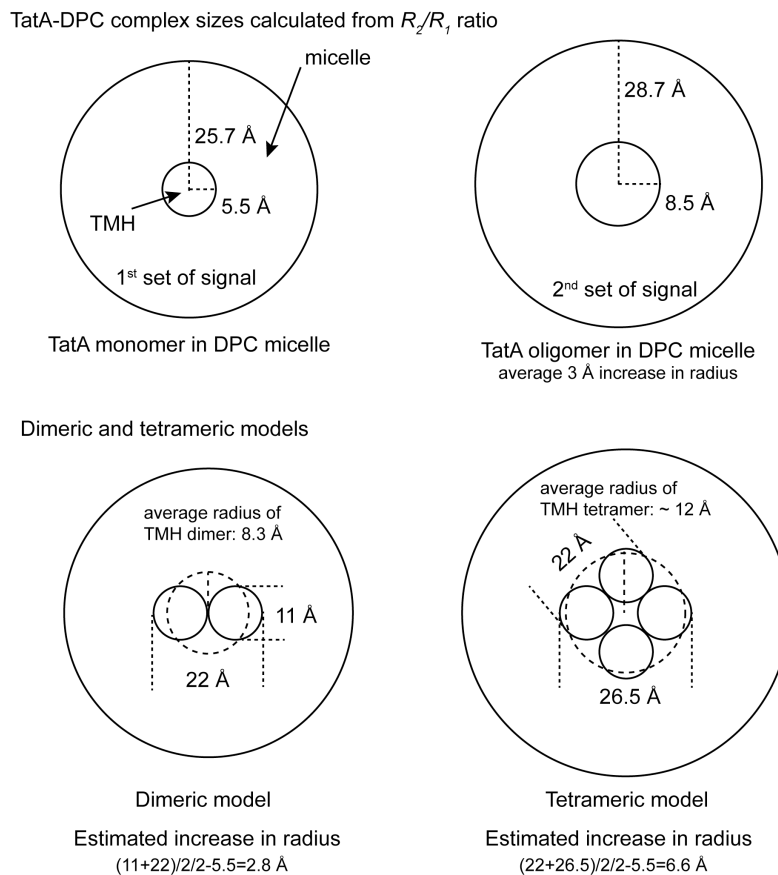

**Figure S6. Estimation of the TatA-DPC complexes sizes based on backbone dynamics.** The upper panel shows the 2D illustrations of back-calculated sizes of TatA-DPC complexes based on the 1<sup>st</sup> (upper left) and 2<sup>nd</sup> sets of peaks (upper right). The data of the 1<sup>st</sup> set corresponds well to a monomeric model (upper left), whereas the 2<sup>nd</sup> set exhibits a 3 Å increase in radius compared to the 1<sup>st</sup> set. The lower panel shows schematic models of a dimeric TatA-DPC complex and a tetrameric TatA-DPC complex. The averaged radius contributed by THM is estimated to be 8.3 Å or 12 Å based on the dimeric or tetrameric models, and would result in an apparent radius increase of 2.8 Å and 6.6 Å respectively. The diameter of a single helix is assumed to be 11 Å in all calculations. The experimental data of the 2<sup>nd</sup> set fits better to the dimeric model.

**Figure S7**

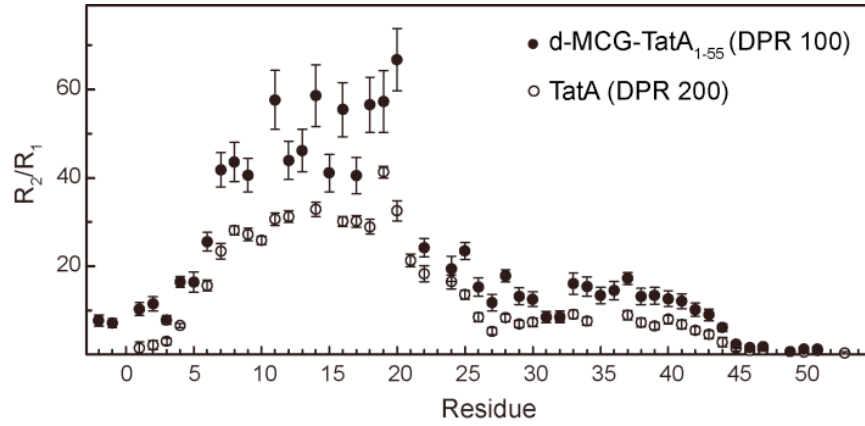

**Figure S7. Backbone dynamics of d-MCG-TatA<sub>1-55</sub>.** The backbone  $^{15}\text{N}$  relaxation parameter  $R_2/R_1$  values of d-MCG-TatA<sub>1-55</sub> at DPR of 100 (filled circle) in comparison with full-length TatA (open circle). The N-terminal MCG-tripeptide extension is numbered as residue -3, -2 and -1 respectively. Residues in the C-terminus of full-length TatA are not shown.

**Figure S8**

**A** spin labeled TatA<sub>1-55</sub>-I12C-MTSL

dimeric model

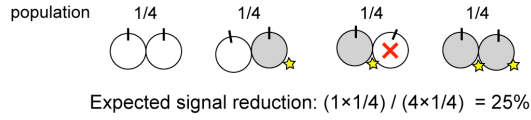

trimeric model

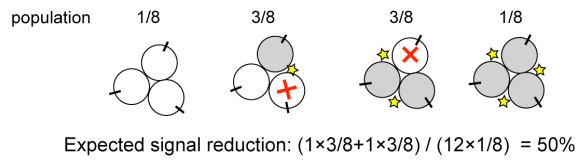

tetrameric model

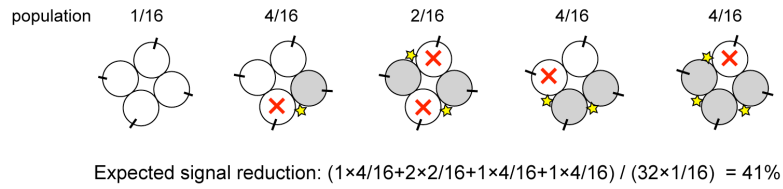

**B** spin labeled TatA<sub>1-55</sub>-I11C-MTSL

dimeric model

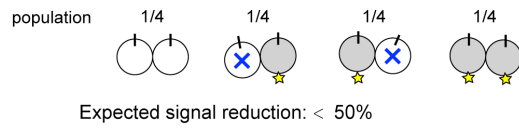

trimeric model

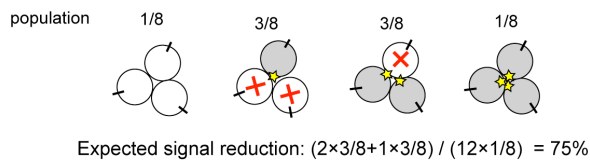

tetrameric model

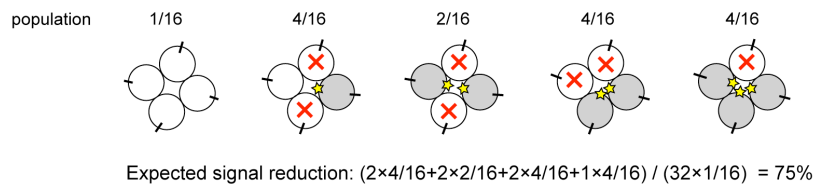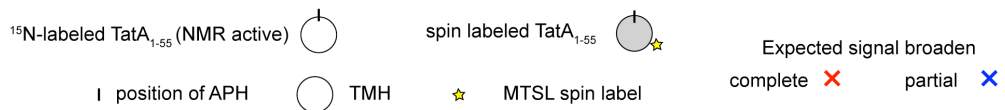

**Figure S8. Illustration of inter-subunit PRE effects of different TatA oligomerization models.** Calculation of the population distribution of different oligomeric species and inter-subunit PRE effects using dimeric, trimeric and tetrameric models for paramagnetic labeling on the inter-subunit interface (panel A, TatA<sub>1-55</sub>-I12C-MTSL) or the opposite side of APH (B, TatA<sub>1-55</sub>-I11C-MTSL). The <sup>15</sup>N-labeled and spin-labeled samples are mixed at 1:1 molar ratio, and the <sup>15</sup>N-labeled sample is the only source generating observable NMR signals. Small yellow star designates the position of the MTSL label, and red and blue crosses indicate expected complete or partial signal broadening by the PRE effect. The expected signal reduction ratio is calculated for each model. The experimental results obtained at DPR ~ 40 for MTSL labeling at either position 12 or 11 best correlate with the dimeric model.

**Figure S9**

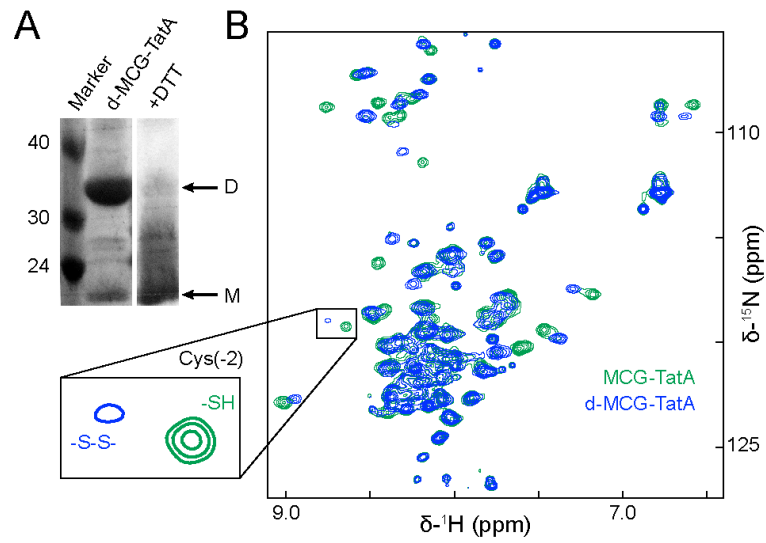

**Figure S9. Formation of disulfide-linked d-MCG-TatA dimer.** (A) SDS-PAGE spectra of freshly eluted d-MCG-TatA from Ni-NTA and DTT reduced MCG-TatA. Positions of dimer and monomer are labeled. (B) HSQC spectra of d-MCG-TatA and MCG-TatA showing the different positions of the residue cysteine (C-2) in the oxidized and reduced states.

**Figure S10**

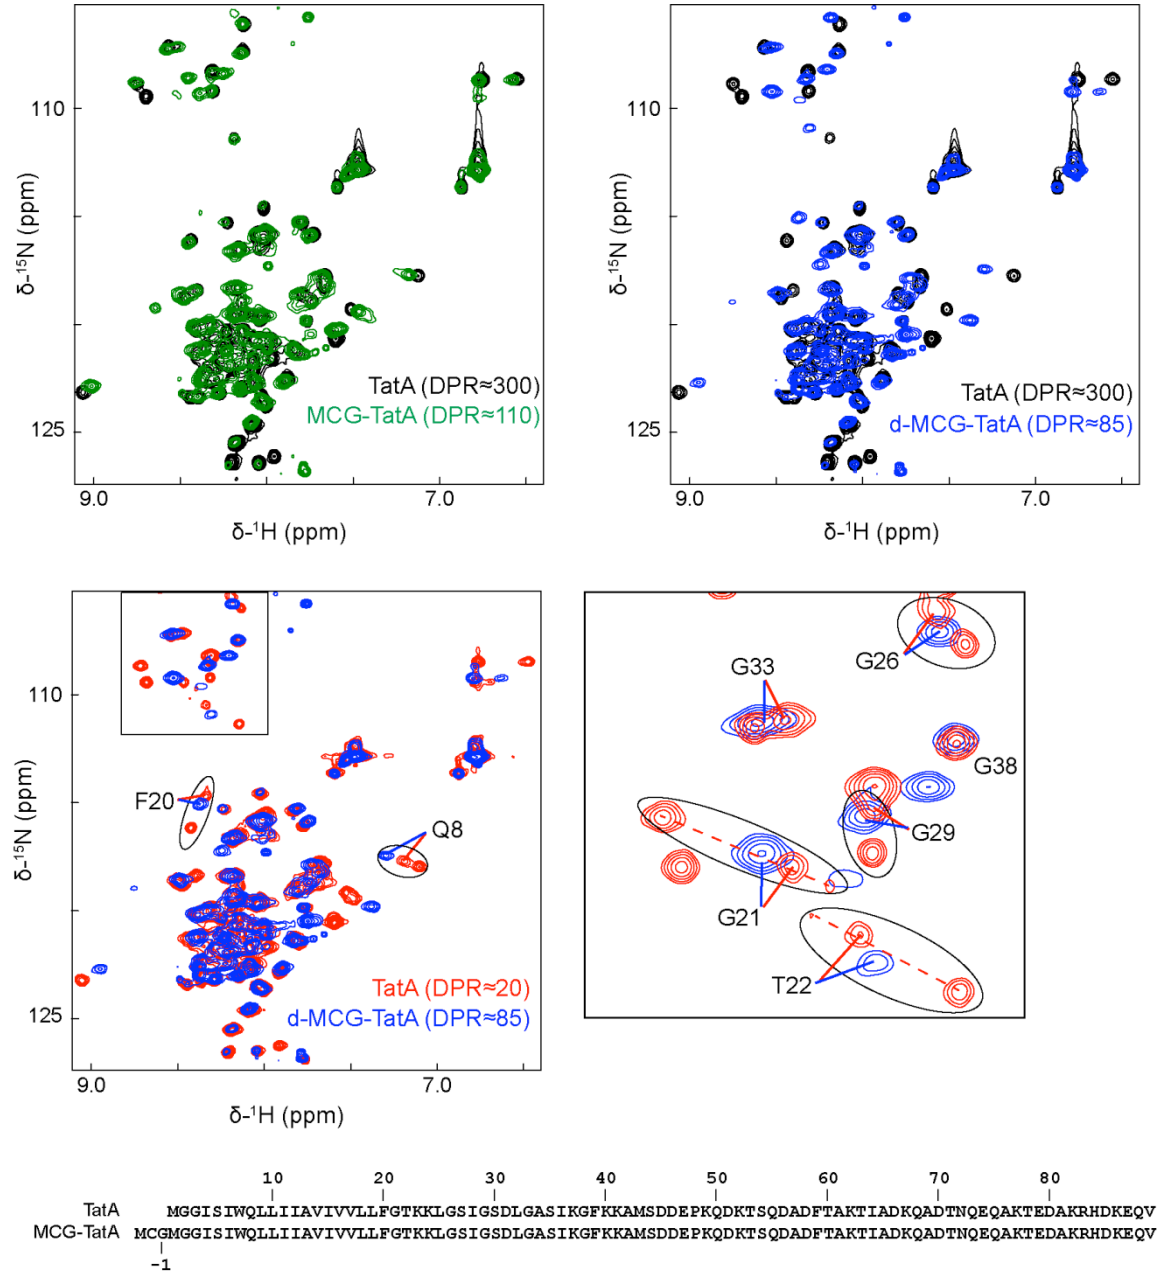

**Figure S10. Spectral comparisons of MCG-TatA, d-MCG-TatA and wt-TatA.**  $^1\text{H}$ - $^{15}\text{N}$  HSQC spectra of full-length TatA at DPR of 300 (black) and 20 (red) in comparison with MCG-TatA (DPR 110, reduced state) and d-MCG-TatA (DPR 85, oxidized state). The red and blue lines indicate peaks of d-MCG-TatA and the 2<sup>nd</sup> peak set in TatA (DPR 20), respectively. Representative peaks from the same residue are grouped together and labeled. Apart from



residues 1-8 that are most significantly affected by the N-terminal extension, the other residues show chemical shift differences less than 0.04 ppm for protons and 0.5 ppm for nitrogens between d-MCG-TatA and the 2<sup>nd</sup> peak set in TatA. The primary sequences of wt-TatA and MCG-TatA are shown at the bottom.

**Figure S11**

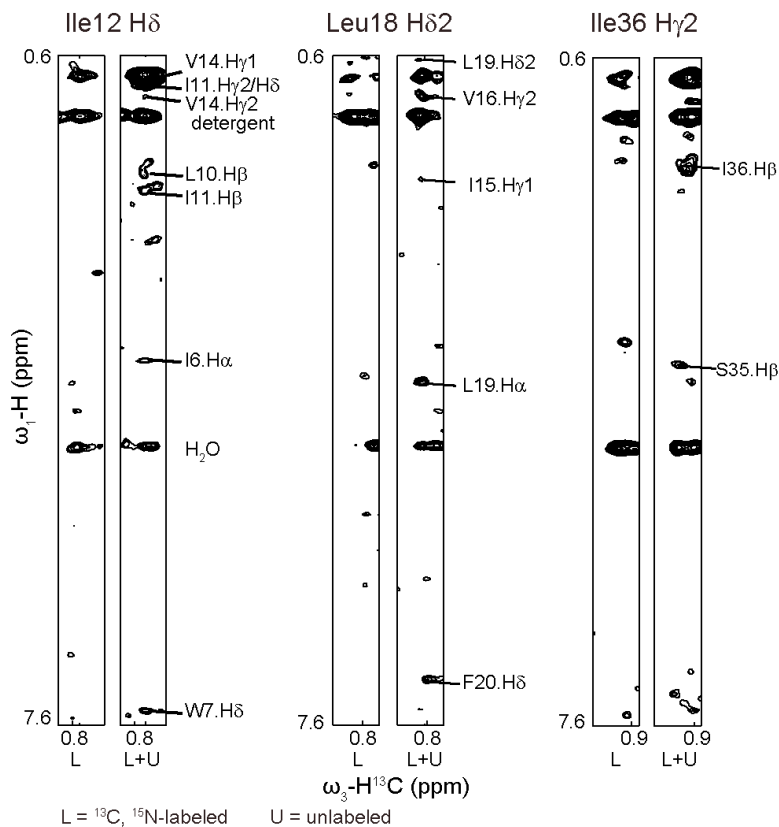

**Figure S11. Verification of inter-subunit NOEs.** Representative strips from the 3D  $^{13}\text{C}/^{15}\text{N}$ -filtered ( $\omega_1$ ),  $^{13}\text{C}$ -edited ( $\omega_3$ ) NOESY-HSQC spectra (mixing time 300 ms) of uniformly labeled dimer (left panels) and mixed dimer (right panels). Assignments for inter-subunit NOE cross peaks are labeled in the right panels, whereas no signals are observable in the corresponding positions in the control sample (left panels). The strong peaks present in the control experiment (left panels) originate from detergent and water signals.

**Figure S12**

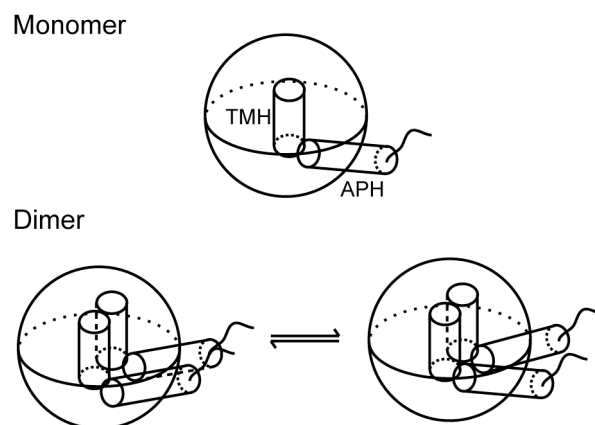

**Figure S12. A schematic model of the TatA dimerization.**
